# Supplementary material for: The Effect of Age on Increasing Susceptibility to Retinal Nerve Fiber Layer Loss in Glaucoma
Source: PubMed Central journal article supplement — Invest Ophthalmol Vis Sci. 2020 Nov 5;61(13):8. doi: 10.1167/iovs.61.13.8 (PMC7645210; doi:10.1167/iovs.61.13.8), 2020-11-05
Supplement: iovs-61-13-8_s001.pdf [file iovs-61-13-8_s001.pdf]

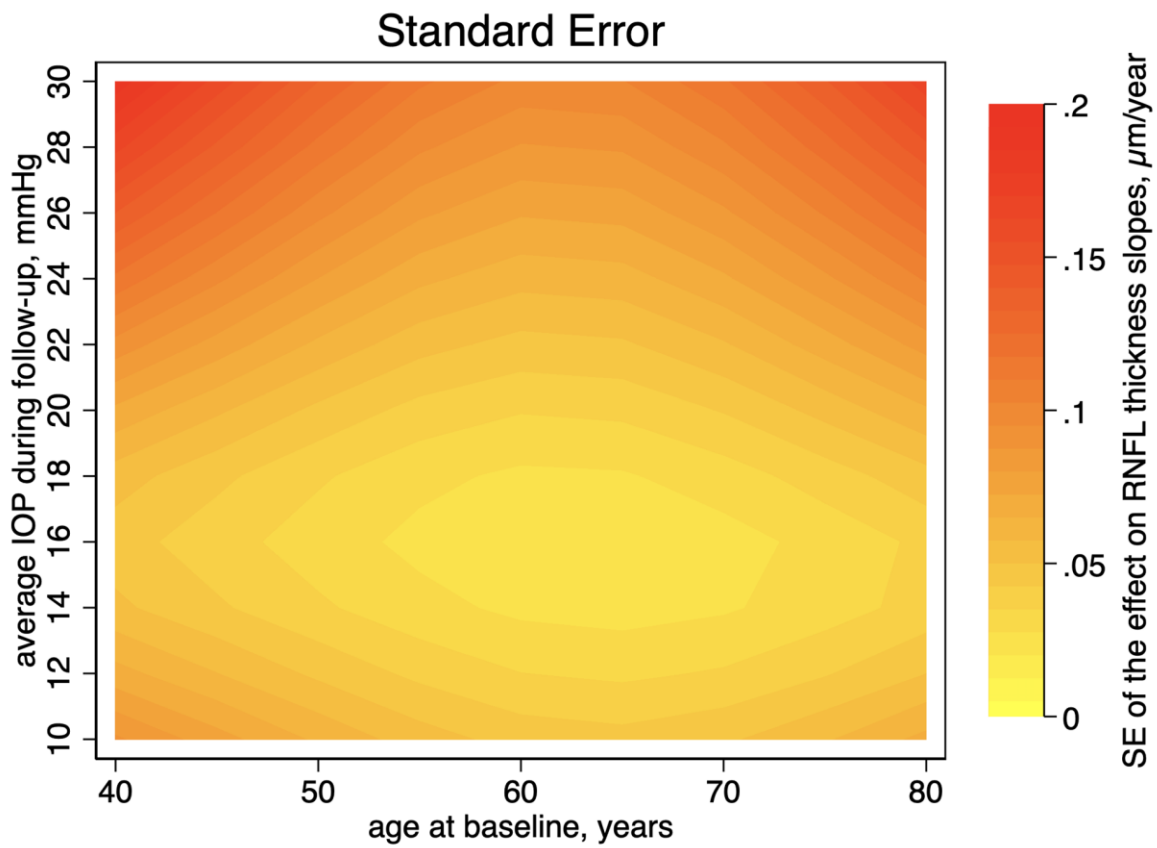

**Figure S1.** Contour plot for the standard error of the predictions shown in Figure 2. Uncertainty was minimal across the whole region (below 0.2  $\mu\text{m}/\text{year}$ ).
