# Supplementary material for: The Effect of Age on Increasing Susceptibility to Retinal Nerve Fiber Layer Loss in Glaucoma
Source: PubMed Central journal article supplement — Invest Ophthalmol Vis Sci. 2020 Nov 5;61(13):8. doi: 10.1167/iovs.61.13.8 (PMC7645210; doi:10.1167/iovs.61.13.8), 2020-11-05
Supplement: iovs-61-13-8_s002.pdf [file iovs-61-13-8_s002.pdf]

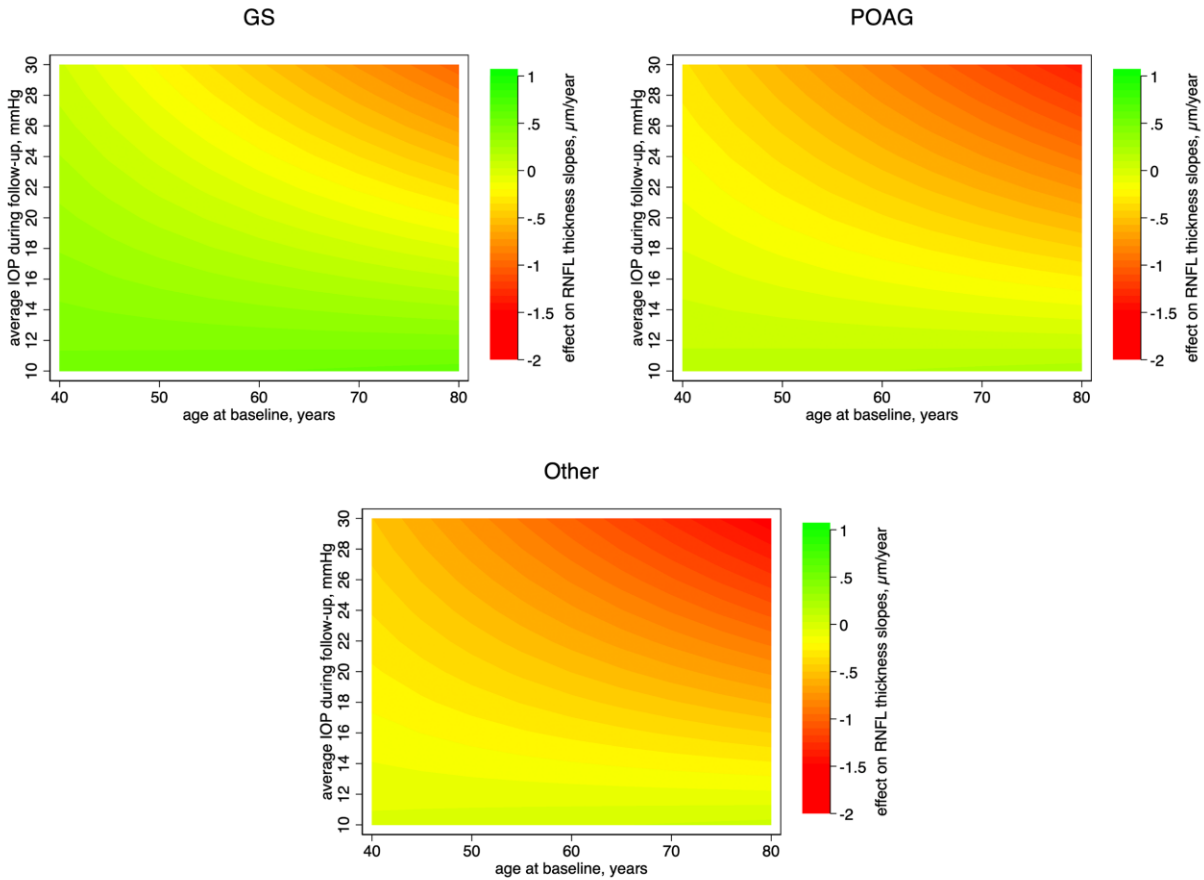

**Figure S2.** Contour plots showing the effect of the interaction between mean intraocular pressure (IOP) and age on rates of retinal nerve fiber layer (RNFL) thickness change over time, across glaucoma suspects (GS), those with primary open angle glaucoma (POAG) and those with other glaucoma diagnosis based on International Classification of Diseases codes at baseline. All other covariates were set to their mean values for the overall sample. Readers can navigate over the x-axis values to estimate the influence of average IOP (y-axis) on the rates of RNFL thickness progression over different age groups. The average rate of RNFL thickness loss for each group was subtracted from the predicted rate of change for each given age and mean IOP, so that results can be interpreted as either protective (green color or slower rates of change) or harmful (warmer colors or faster rates of change) in relation to the average rate of change of the sample.
