# Supplementary material for: The Effect of Age on Increasing Susceptibility to Retinal Nerve Fiber Layer Loss in Glaucoma
Source: PubMed Central journal article supplement — Invest Ophthalmol Vis Sci. 2020 Nov 5;61(13):8. doi: 10.1167/iovs.61.13.8 (PMC7645210; doi:10.1167/iovs.61.13.8), 2020-11-05
Supplement: iovs-61-13-8_s003.pdf [file iovs-61-13-8_s003.pdf]

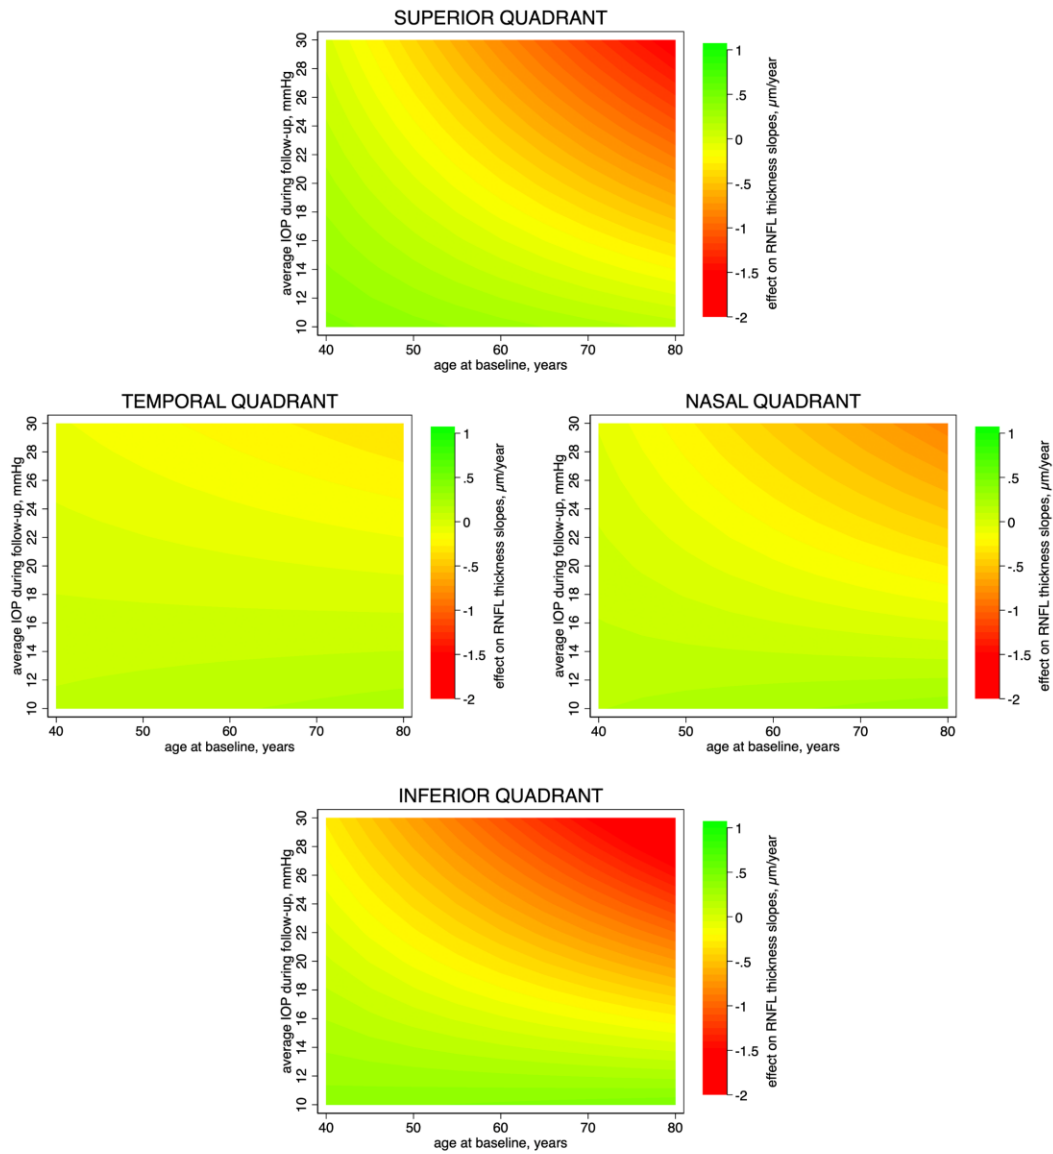

**Figure S3.** Contour plots showing the effect of the interaction between mean intraocular pressure (IOP) and age on the average rates of retinal nerve fiber layer (RNFL) thickness change over time for each quadrant. All other covariates were set to their means. Warmer colors represent faster rates of global RNFL thickness loss in  $\mu\text{m}/\text{year}$ .
