# Supplementary material for: The Effect of Age on Increasing Susceptibility to Retinal Nerve Fiber Layer Loss in Glaucoma
Source: PubMed Central journal article supplement — Invest Ophthalmol Vis Sci. 2020 Nov 5;61(13):8. doi: 10.1167/iovs.61.13.8 (PMC7645210; doi:10.1167/iovs.61.13.8), 2020-11-05
Supplement: iovs-61-13-8_s004.pdf [file iovs-61-13-8_s004.pdf]

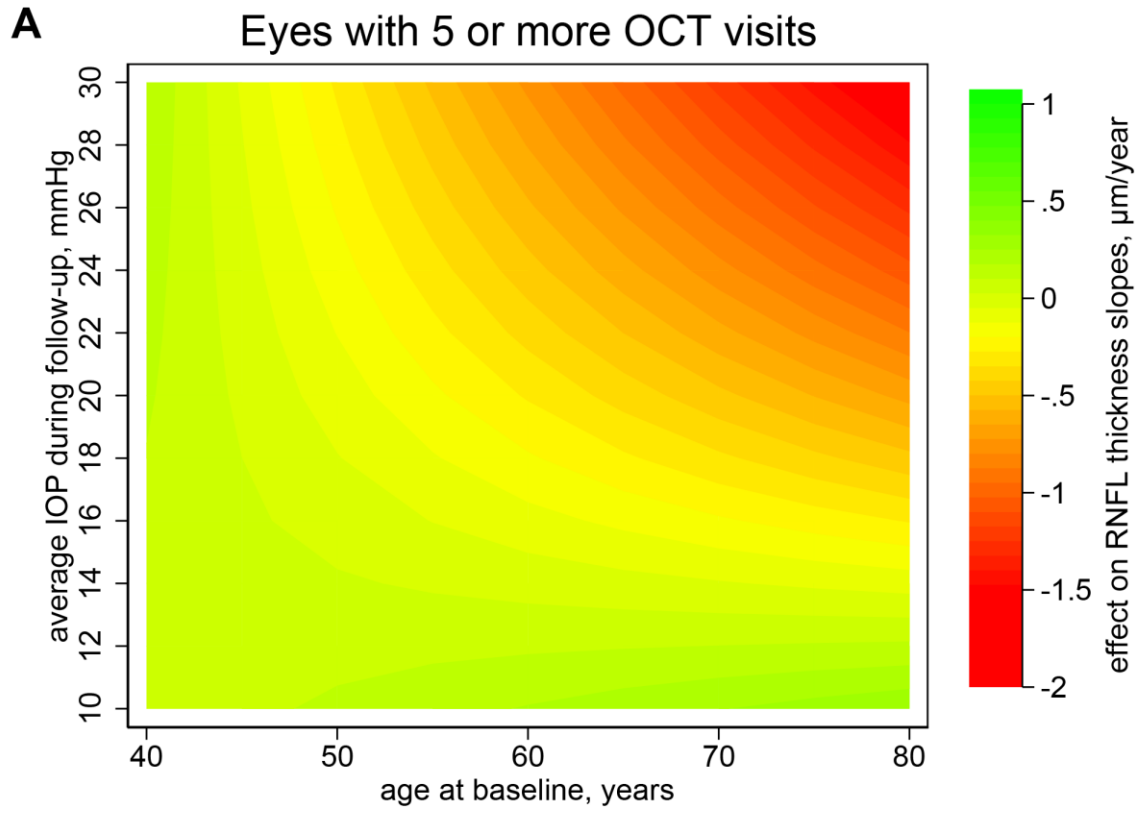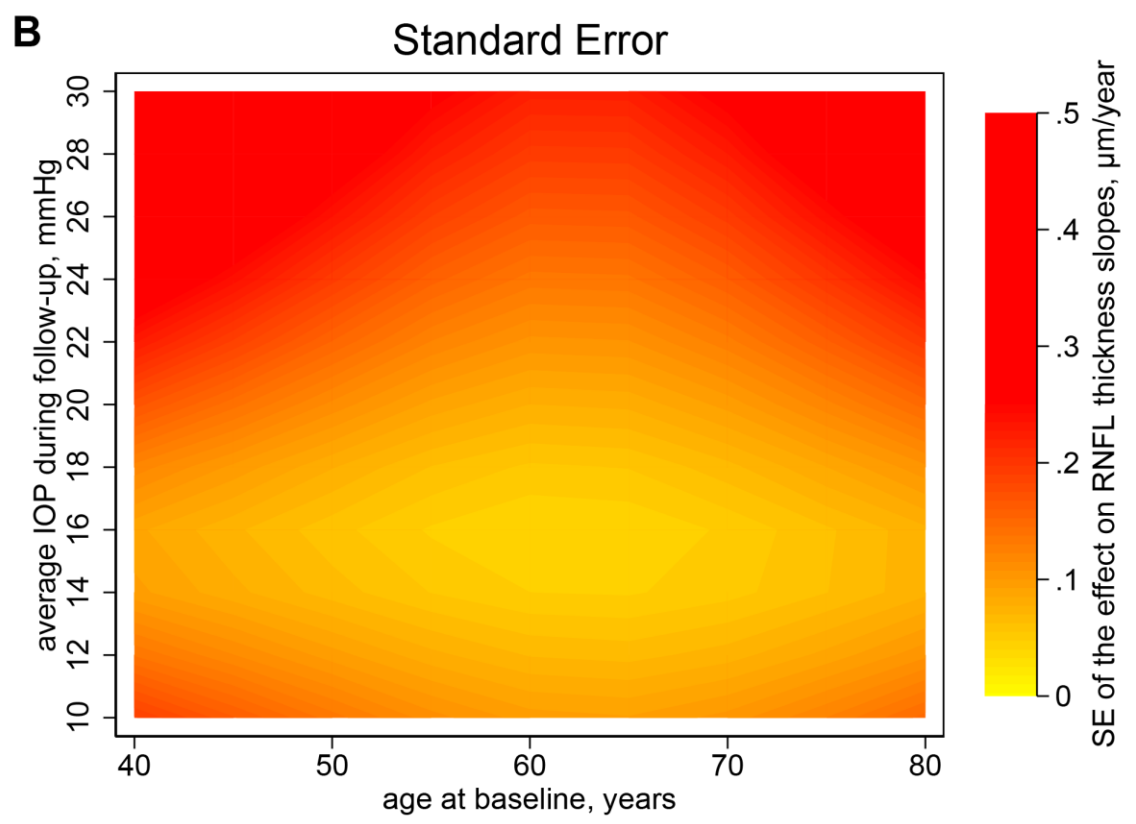

**Figure S4. (A)** Contour plot showing the effect of the interaction between mean intraocular pressure (IOP) and age on the average rates of retinal nerve fiber layer (RNFL) thickness change over time for eyes with 5 or more spectral-domain optical coherence tomography (SD OCT) visits. **(B)** Contour plot for the standard error of the predictions shown in **A**.
